# Supplementary material for: Zinc supplementation mitigates its dyshomeostasis in experimental diabetic rats by regulating the expression of zinc transporters and metallothionein
Source: Royal Society of Chemistry journal article supplement (doi:10.1039/c7mt00210f), 2017-01-01
Supplement: c7mt00210f2.pdf [file c7mt00210f2.pdf]

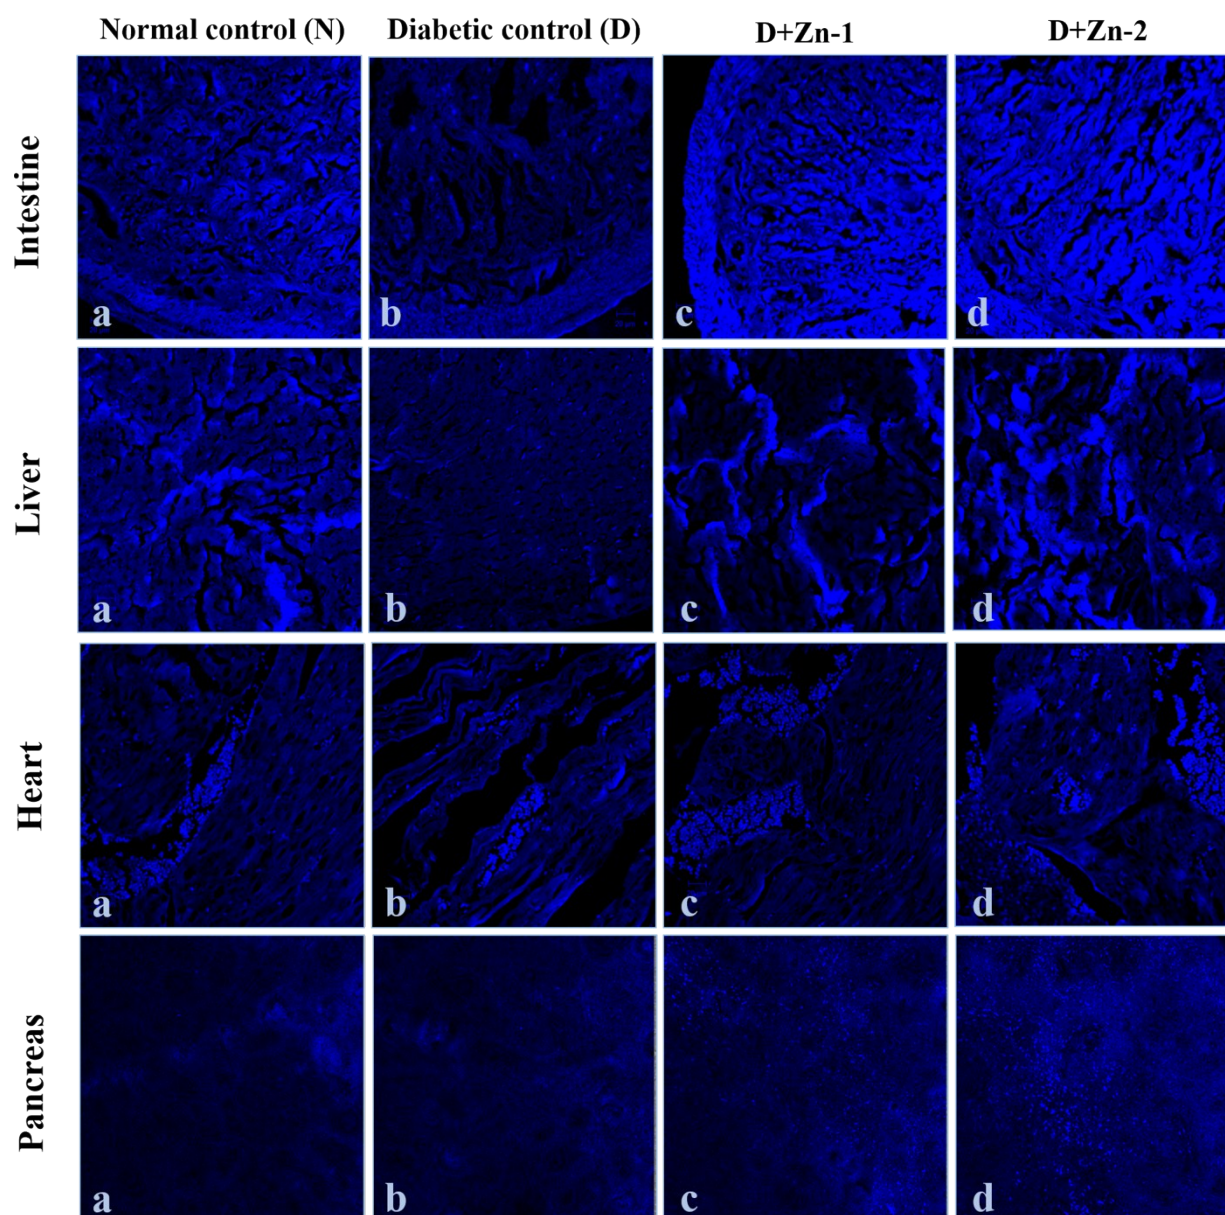

**Supplementary Fig.1.** Tissue intracellular localization of Zn. Confocal laser scanning microscopy for identification of Zinc content (20 X objective).

Normal control rat (A); Diabetic control rat (B); D+Zn-1 (Dose-1 ) Zn supplemented diabetic rat (C) and D+Zn-2 (Dose-2) Zn supplemented diabetic rat (D).

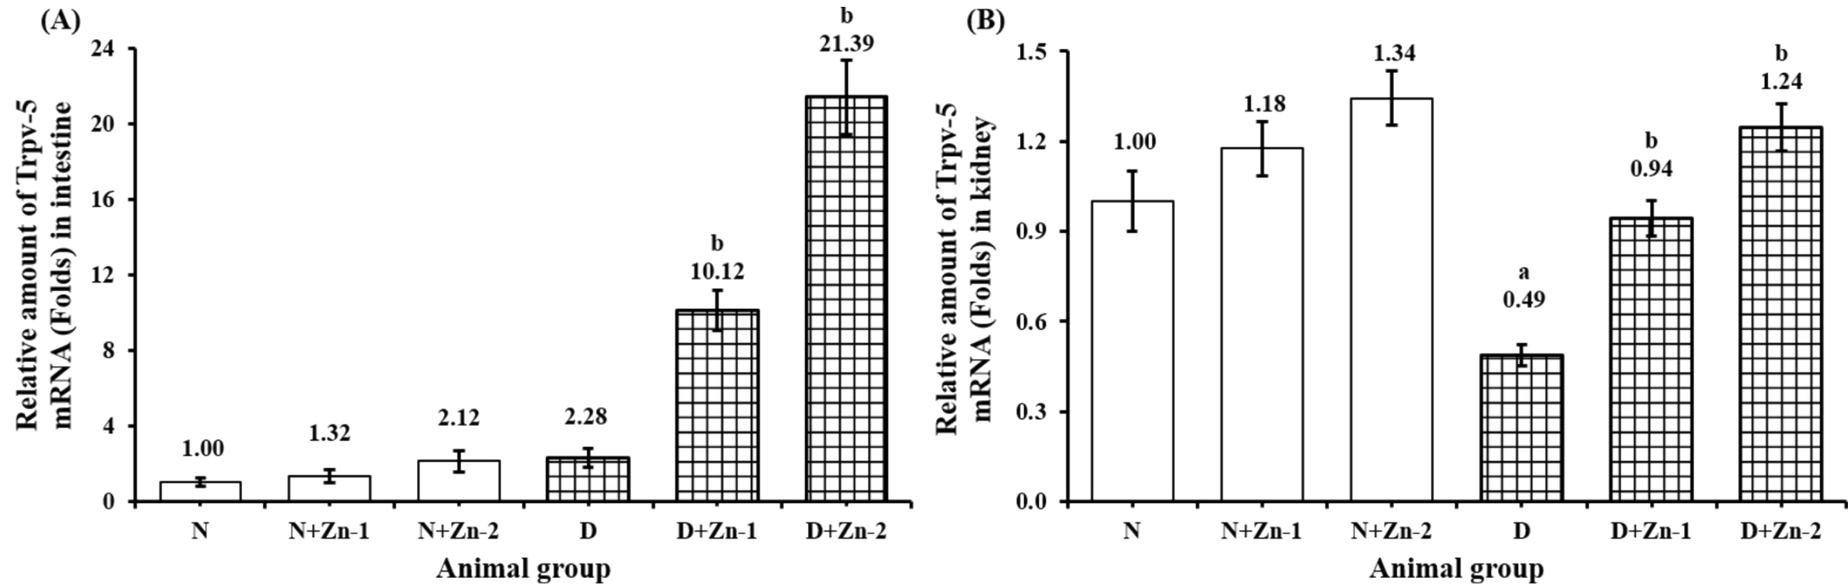

**Supplementary Fig.2.** Expression profile of mRNA for Ca transporters- TRPV-5 in (A) Intestine and (B) Renal tissue of diabetic rats.

Values are mean  $\pm$  SEM of 8 animals in each group. Relative gene expressions were normalized to  $\beta$ -actin level and expressed in arbitrary units as fold change compared with normal control. a: Significantly different from normal control group ( $p < 0.05$ ), b: Significantly different from diabetic control group ( $p < 0.05$ ). N: Normal control; D: Diabetic control; Zn-1: Zinc supplemented at dose 1; Zn-2: Zinc supplemented at dose 2.
